# Supplementary material
Source: publisher site journal article supplement (https://static.cambridge.org/content/id/urn:cambridge.org:id:article:S0008347X20000413/resource/name/S0008347X20000413supp002.pdf)
Supplement: Supplementary file 1 [file S0008347X20000413supp002.pdf]

**Supplementary Table S11.** Results of fitting logistic regression models for number of *Drosophila suzukii* when cultivars. Sonata, Skeena, Sweetheart, and Staccato are pooled. Models are symbolised by their highest-order terms. Thus, R (row) + H (height) + A (aspect) denotes a model with main effects, whereas R + H\*A denotes a model with **main** effects plus an H\*A interaction.

| Model | Predictors      | Deviance       | df          | AIC <sup>a</sup> | Models compared | Deviance difference | df difference |
|-------|-----------------|----------------|-------------|------------------|-----------------|---------------------|---------------|
| 1     | A*H*R           | 8552.88        | 1352        | 1805.2           | .               | .                   | .             |
| 2     | A*H + H*R + R*A | 8572.16        | 1354        | 1799.0           | 2_1             | 19.3                | 2             |
| 3a    | A*H + H*R       | 8576.52        | 1356        | 1795.2           | 3a_2            | 4.4                 | 2             |
| 3b    | A*H + R*A       | 8595.40        | 1356        | 1795.3           | 3b_2            | 23.2                | 2             |
| 3c    | H*R + R*A       | 8632.80        | 1355        | 1785.3           | 3c_2            | 60.6                | 1             |
| 4a    | H*R + A         | 8635.57        | 1357        | 1781.9           | 4a_3a           | 59.0                | 1             |
| 4b    | H*A + R         | 8598.01        | 1358        | 1792.1           | 4b_3a           | 21.5                | 2             |
| 4c    | R*A + H         | 8653.19        | 1357        | 1782.9           | 4c_3a           | 76.7                | 1             |
| 5     | H + R + A       | 8655.95        | 1359        | 1780.2           | 5_4b            | 57.9                | 1             |
| 6a    | R + A           | 8702.97        | 1360        | 1798.2           | 6a_5            | 47.0                | 1             |
| 6b    | R + H           | 8656.00        | 1360        | 1779.5           | 6b_5            | 0.1                 | 1             |
| 6c    | H + A           | 8744.19        | 1361        | 1764.9           | 6c_5            | 88.2                | 2             |
| 7a    | <b>H</b>        | <b>8744.22</b> | <b>1362</b> | <b>1764.2</b>    | <b>7a_6b</b>    | <b>88.2</b>         | <b>2</b>      |
| 7b    | A               | 8791.03        | 1362        | 1780.7           | 7b_6b           | 135.0               | 2             |
| 7c    | R               | 8702.99        | 1361        | 1797.4           | 7c_6b           | 47.0                | 1             |
| 8     | None            | 8791.04        | 1363        | 1779.9           | 8_7a            | 46.8                | 1             |

<sup>a</sup> The bolded line is the lowest Akaike information criterion (AIC) value (and the best fit).

**Supplementary Table S12.** Results of fitting logistic regression models for number of *Drosophila suzukii* and cultivar Sonata only. Explanation of model as in Table S11.

| Model     | Predictors              | Deviance       | df         | AIC <sup>a</sup>         | Models compared | Deviance difference | df difference |
|-----------|-------------------------|----------------|------------|--------------------------|-----------------|---------------------|---------------|
| 1         | A*H*R                   | 1149.19        | 292        | 469.7                    | .               | .                   |               |
| 2         | A*H + H*R + R*A         | 1169.29        | 294        | 478.6                    | 2_1             | 20.1                | 2             |
| 3a        | A*H + H*R               | 1185.49        | 296        | 476.8                    | 3a_2            | 16.2                | 2             |
| 3b        | A*H + R*A               | 1173.28        | 296        | 474.1                    | 3b_2            | 4.0                 | 2             |
| 3c        | H*R + R*A               | 1169.75        | 295        | 479.4                    | 3c_2            | 0.5                 | 1             |
| 4a        | H*R + A                 | 1185.86        | 297        | 477.2                    | 4a_3c           | 16.1                | 2             |
| 4b        | R*A + H                 | 1173.81        | 297        | 474.8                    | 4b_3c           | 4.1                 | 2             |
| 5         | R + A + H               | 1189.95        | 299        | 472.6                    | 5_4b            | 16.1                | 2             |
| 6a        | R + A                   | 1191.52        | 300        | 476.3                    | 6a_5            | 1.6                 | 1             |
| <b>6b</b> | <b>R + H</b>            | <b>1212.44</b> | <b>300</b> | <b>469.8<sup>b</sup></b> | <b>6b_5</b>     | <b>22.5</b>         | <b>1</b>      |
| 6c        | H + A                   | 1221.91        | 301        | 475.2                    | 6c_5            | 32.0                | 1             |
| 7a        | R                       | 1213.79        | 301        | 473.0                    | 7a_6a           | 22.3                | 1             |
| 7b        | A                       | 1222.81        | 302        | 477.3                    | 7b_6a           | 31.3                | 2             |
| 8         | R = edge vs. centre + A | 1221.50        | 301        | 475.8                    | 8_6a            | 30.0                | 1             |
| 9         | None                    | 1245.38        | 303        | 477.0                    | 9_6b            | 32.9                | 3             |

<sup>a</sup> The bolded line is the lowest Akaike information criterion (AIC) value (and the best fit).

<sup>b</sup> The simpler model (6b) was chosen over model 1 to better interpret emerging patterns.

**Supplementary Table S13.** Results of fitting logistic regression models for number of *Drosophila suzukii* and cultivar Skeena only. Explanation of model as in Table S11.

| Model    | Predictors      | Deviance       | df         | AIC <sup>a</sup>         | Models compared | Deviance difference | df difference |
|----------|-----------------|----------------|------------|--------------------------|-----------------|---------------------|---------------|
| 1        | A*H*R           | 2547.58        | 312        | 411.6                    | .               | .                   | .             |
| 2        | A*H + H*R + R*A | 2584.27        | 314        | 410.8                    | 2_1             | 36.7                | 2             |
| 3a       | A*H + H*R       | 2586.10        | 316        | 409.6                    | 3a_2            | 1.8                 | 2             |
| 3b       | A*H + R*A       | 2637.10        | 316        | 414.3                    | 3b_2            | 52.8                | 2             |
| 3c       | H*R + R*A       | 2598.70        | 315        | 404.2                    | 3c_2            | 14.4                | 1             |
| 4a       | H*R + A         | 2602.41        | 317        | 403.5                    | 4a_3a           | 16.3                | 1             |
| 4b       | H*A + R         | 2640.93        | 318        | 413.4                    | 4b_3a           | 54.8                | 2             |
| 5        | H + R + A       | 2654.99        | 319        | 407.5                    | 5_4a            | 52.6                | 2             |
| 6a       | R + A           | 2655.41        | 320        | 405.8                    | 6a_5            | 0.4                 | 1             |
| 6b       | R + H           | 2655.41        | 320        | 406.6                    | 6b_5            | 0.4                 | 1             |
| 6c       | H + A           | 2693.46        | 321        | 396.1                    | 6c_5            | 38.5                | 2             |
| 7a       | H               | 2693.58        | 322        | 395.2                    | 7a_6a           | 38.2                | 2.0           |
| 7b       | A               | 2693.81        | 322        | 394.8                    | 7b_6a           | 38.4                | 2.0           |
| 7c       | R               | 2655.84        | 321        | 405.0                    | 7c_6a           | 0.4                 | 1.0           |
| 8        | H*R             | 2602.48        | 318        | 402.7                    | 8_4a            | 0.1                 | 1             |
| <b>9</b> | <b>None</b>     | <b>2693.94</b> | <b>323</b> | <b>394.0<sup>b</sup></b> | <b>9_7b</b>     | <b>0.1</b>          | <b>1</b>      |

<sup>a</sup> The bolded line is the lowest Akaike information criterion (AIC) value (and the best fit); in this case the null model.

<sup>b</sup> Backwards elimination showed that a model with no effects (the null model) was the best fit, neither canopy location nor orchard row influenced *D. suzukii* distribution.

**Supplementary Table S14.** Results of fitting logistic regression models for number of *Drosophila suzukii* and cultivar Sweetheart only. Explanation of model as in Table S11.

| Model     | Predictors      | Deviance       | df         | AIC <sup>a</sup> | Models compared | Deviance difference | df difference |
|-----------|-----------------|----------------|------------|------------------|-----------------|---------------------|---------------|
| 1         | A*H*R           | 2497.58        | 357        | 489.4            | .               | .                   | .             |
| 2         | A*H + H*R + R*A | 2613.85        | 359        | 478.9            | 2_1             | 116.3               | 2             |
| 3a        | A*H + H*R       | 2615.56        | 361        | 476.5            | 3a_2            | 1.7                 | 2             |
| 3b        | A*H + R*A       | 2618.61        | 361        | 475.8            | 3b_2            | 4.8                 | 2             |
| 3c        | H*R + R*A       | 2634.74        | 360        | 472.4            | 3c_2            | 20.9                | 1             |
| 4a        | H*R + A         | 2636.05        | 362        | 470.0            | 4a_3a           | 20.5                | 1             |
| 4b        | H*A + R         | 2619.84        | 363        | 473.5            | 4b_3a           | 4.3                 | 2             |
| 4c        | R*A + H         | 2638.79        | 362        | 469.8            | 4c_3a           | 23.2                | 1             |
| 5         | H + R + A       | 2640.12        | 364        | 467.6            | 5_4b            | 20.3                | 1             |
| 6a        | R + A           | 2649.19        | 365        | 470.0            | 6a_5            | 9.1                 | 1             |
| 6b        | R + H           | 2658.97        | 365        | 465.4            | 6b_5            | 18.9                | 1             |
| 6c        | H + A           | 2665.35        | 366        | 457.0            | 6c_5            | 25.2                | 2             |
| <b>7a</b> | <b>H</b>        | <b>2684.66</b> | <b>367</b> | <b>454.4</b>     | <b>7a_6a</b>    | <b>35.5</b>         | <b>2</b>      |
| 7b        | A               | 2674.65        | 367        | 459.9            | 7b_6a           | 25.5                | 2             |
| 7c        | R               | 2667.94        | 366        | 466.7            | 7c_6a           | 18.8                | 1             |
| 8         | None            | 2693.90        | 368        | 456.3            | 8_7a            | 9.2                 | 1             |

<sup>a</sup> The bolded line is the lowest Akaike information criterion (AIC) value (and the best fit).

**Supplementary Table S15.** Results of fitting logistic regression models for number of *Drosophila suzukii* and cultivar Staccato only. Explanation of model as in Table S11.

| Model     | Predictors      | Deviance       | df         | AIC <sup>a</sup> | Models compared | Deviance difference | df difference |
|-----------|-----------------|----------------|------------|------------------|-----------------|---------------------|---------------|
| 1         | A*H*R           | 1788.56        | 355        | 547.2            | .               | .                   | .             |
| 2         | A*H + H*R + R*A | 1792.70        | 357        | 543.9            | 2_1             | 4.14                | 2             |
| 3a        | A*H + H*R       | 1812.64        | 359        | 541.5            | 3a_2            | 19.94               | 2             |
| 3b        | A*H + R*A       | 1794.10        | 359        | 542.8            | 3b_2            | 1.40                | 2             |
| 3c        | H*R + R*A       | 1866.80        | 358        | 545.7            | 3c_2            | 74.10               | 1             |
| 4a        | H*R + A         | 1886.31        | 360        | 543.5            | 4a_3b           | 92.21               | 1             |
| 4b        | H*A + R         | 1812.74        | 361        | 539.7            | 4b_3b           | 18.64               | 2             |
| 4c        | R*A + H         | 1866.89        | 360        | 543.9            | 4c_3b           | 72.79               | 1             |
| 5         | H + R + A       | 1886.45        | 362        | 541.5            | 5_4b            | 73.71               | 1             |
| 6a        | R + A           | 1979.97        | 363        | 543.4            | 6a_5            | 93.52               | 1             |
| 6b        | R + H           | 1952.36        | 363        | 535.7            | 6b_5            | 65.91               | 1             |
| 6c        | H + A           | 1928.32        | 364        | 542.1            | 6c_5            | 41.88               | 2             |
| <b>7a</b> | <b>H</b>        | <b>1992.98</b> | <b>365</b> | <b>531.8</b>     | <b>7a_6c</b>    | <b>64.66</b>        | <b>1</b>      |
| 7b        | A               | 2019.04        | 365        | 543.4            | 7b_6c           | 90.72               | 1             |
| 7c        | R               | 2047.34        | 364        | 549.3            | 7c_6c           | 119.02              | 0             |
| 8         | None            | 2085.79        | 366        | 545.2            | 8_7a            | 92.81               | 1             |

<sup>a</sup> The bolded line is the lowest Akaike information criterion (AIC) value (and the best fit).

**Supplementary Table S16.** Results of one-way analysis of variance of the intraspecific aggregated egg distribution of *Drosophila suzukii*.

| <b>Source</b>   | <b>df</b> | <b>Sum of squares</b> | <b>Mean square</b> | <b>F-Ratio</b> | <b>P-value</b> |
|-----------------|-----------|-----------------------|--------------------|----------------|----------------|
| Sector          | 3         | 0.762                 | 0.254              | 0.4773         | 0.7039         |
| Error           | 12        | 6.382                 | 0.532              |                |                |
| Corrected total | 15        | 7.144                 |                    |                |                |

$R^2 = 0.11$ .

**Supplementary Table S17.** Results of one-way analysis of variance of the intraspecific aggregated egg distribution of native *Drosophila* species.

| <b>Source</b>   | <b>df</b> | <b>Sum of squares</b> | <b>Mean square</b> | <b>F-Ratio</b> | <b>P-value</b> |
|-----------------|-----------|-----------------------|--------------------|----------------|----------------|
| Sector          | 3         | 1.252                 | 0.417              | 0.4845         | 0.6993         |
| Error           | 12        | 10.341                | 0.862              |                |                |
| Corrected total | 15        | 11.593                |                    |                |                |

$R^2 = 0.11$ .

**Supplementary Table S18.** Results of one-way analysis of variance of the interspecific aggregated egg distribution of *Drosophila suzukii* and of native *Drosophila* species.

| <b>Source</b>   | <b>df</b> | <b>Sum of squares</b> | <b>Mean square</b> | <b>F-Ratio</b> | <b>P-value</b> |
|-----------------|-----------|-----------------------|--------------------|----------------|----------------|
| Sector          | 3         | 6.157                 | 2.052              | 0.8268         | 0.5042         |
| Error           | 12        | 29.787                | 2.482              |                |                |
| Corrected Total | 15        | 35.943                |                    |                |                |

$R^2 = 0.17$ .
